# Supplementary material for: Graphene oxide as a multifunctional synergist of insecticides against lepidopteran insect
Source: Royal Society of Chemistry journal article supplement (doi:10.1039/c8en00902c), 2018-11-26
Supplement: c8en00902c1.pdf [file c8en00902c1.pdf]

For: *Environmental Science: Nano*

Correspondence to:

Zhenying Wang

Institute of Plant Protection

Chinese Academy of Agricultural Sciences

No. 2 West Yuanmingyuan Road

Beijing 100193, China

Phone: 86-10-62815945

Fax number: 86-10-62815945

E-mail: zywang@ippcaas.cn

**Graphene oxide as a multifunctional synergist of insecticides against**

**Lepidopteran insect**

Xiuping Wang<sup>1,2,§</sup>, Haicui Xie<sup>2,§</sup>, Zhengying Wang<sup>1\*</sup>, Kanglai He<sup>1</sup>, Dapeng Jing<sup>1</sup>

<sup>1</sup>*The State Key Laboratory for Biology of Plant Diseases and Insect Pests, Institute of Plant Protection, Chinese Academy of Agricultural Sciences, Beijing 100193, P. R. China.*

<sup>2</sup>*College of Agronomy and Biotechnology, Hebei Normal University of Science and Technology, Qinhuangdao 066000, PR China*

<sup>§</sup>*Xiuping Wang and Haicui Xie contributed equally to this work.*

Table S1. The dose response relationship curves and correlation coefficient of Cyf, Mon, Imi, Cyf-GO, Mon-GO and Imi-GO against ACB at 24 h.

| Treatment | Linear regression equation | Correlation coefficient(r) |
|-----------|----------------------------|----------------------------|
| Cyf       | $y=0.79+0.78x$             | $r=0.99$                   |
| Cyf+GO    | $y=0.82+1.07x$             | $r=0.95$                   |
| Mon       | $y=0.68+0.67x$             | $r=0.97$                   |
| Mon+GO    | $y=0.68+0.70x$             | $r=0.97$                   |
| Imi       | $y=0.73+1.60x$             | $r=0.96$                   |
| Imi+GO    | $y=1.29+1.46 x$            | $r=0.97$                   |

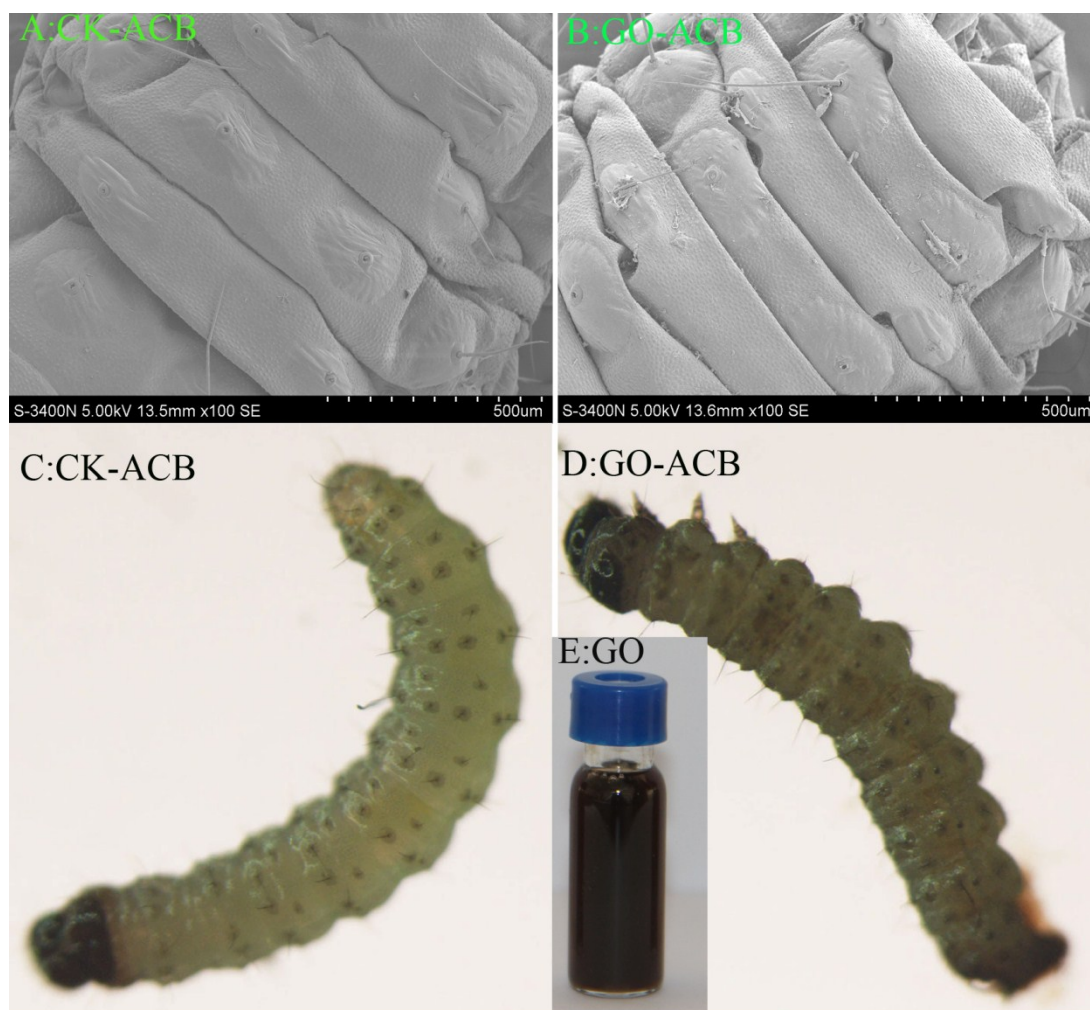

Fig. S1 Images of interactions between GO and ACB. (A-B) SEM images of ACB untreated and treated by GO; (C-D) Microscope images of ACB untreated and treated by GO at the concentration of  $1000 \mu\text{g mL}^{-1}$  after 24 h of treatment at  $25^{\circ}\text{C}$  and observed using a dissecting microscope ( $3.2 \times$ ); (E) Photo of GO dispersion
